# Supplementary material for: Neuropsychiatric events associated with montelukast in patients with asthma: a systematic review
Source: PubMed Central journal article supplement — Eur Respir Rev. 2023 Sep 27;32(169):230079. doi: 10.1183/16000617.0079-2023 (PMC10523155; doi:10.1183/16000617.0079-2023), 2023-09-27
Supplement: ERR-0079-2023.SUPPLEMENT.pdf [file ERR-0079-2023.SUPPLEMENT.pdf]

## **Neuropsychiatric events associated with montelukast in patients with asthma: a systematic review**

Chris Wai Hang Lo<sup>1,2</sup>, Swathi Pathadka<sup>1,3</sup>, Simon Xiwen Qin<sup>1,4</sup>, Lydia WY Fung<sup>1,4</sup>, Vincent Ka Chun Yan<sup>1</sup>, Hei Hang Edmund Yiu<sup>1</sup>, Chloe I Bloom<sup>5</sup>, Ian Chi Kei Wong<sup>1,4,6</sup>, Esther Wai Yin Chan<sup>1,4</sup>

### **Affiliations**

<sup>1</sup> Centre for Safe Medication Practice and Research, Department of Pharmacology and Pharmacy, Li Ka Shing Faculty of Medicine, the University of Hong Kong, Hong Kong SAR, China

<sup>2</sup> Social, Genetic and Developmental Psychiatry Centre, Institute of Psychiatry, Psychology and Neuroscience, King's College London, London, UK

<sup>3</sup> LCCI - Value, Evidence, Outcomes Division, Eli Lilly Services India Private Limited, Bengaluru, India

<sup>4</sup> Laboratory of Data Discovery for Health (D24H), Hong Kong SAR, China

<sup>5</sup> National Heart and Lung Institute, Imperial College London, London, UK

<sup>6</sup> Research Department of Practice and Policy, School of Pharmacy, University College London, London, UK

### **Correspondence**

Professor. Esther WY Chan, Centre for Safe Medication Practice and Research, Department of Pharmacology and Pharmacy, Li Ka Shing Faculty of Medicine, the University of Hong Kong, Office 02-08, 2/F Laboratory Block, 21 Sassoon Road, Hong Kong

(Email: ewchan@hku.hk; Tel: +852 2831 5110)

**Keywords:** asthma, montelukast, neuropsychiatric events, suicide and self-harm, depression, anxiety, neurodegenerative disorders, sleeping disorders

## **SUPPLEMENTARY MATERIAL 1. Search strategy and outcome definitions**

Studies included in this systematic review were searched and identified on 7 September 2022. Literature search was conducted using databases including Pubmed, EMBASE and Cochrane Library.

### **Search terms included in PubMed**

((“Montelukast” [Supplementary Concept] OR “Montelukast” [All Fields] OR “singulair” [All Fields]) OR (“leukotriene-modifying agents” [All Fields]) OR ((leukotrienes [MeSH Terms] OR leukotriene [All Fields]) AND “modifying” [All Fields] AND “agents” [All Fields]) OR (“leukotriene antagonist” [All Fields]) OR (“leukotrienes” [MeSH Terms] OR “leukotriene” [All Fields]) AND “antagonist” [All Fields]) OR (“leukotriene antagonists” [All Fields]) OR (“leukotrienes” [MeSH Terms] OR “leukotriene” [All Fields]) AND “antagonists” [All Fields]) OR (“leukotriene antagonists” [Pharmacological Action]) OR (“leukotriene” [All Fields] AND “receptor” [All Fields] AND “antagonist” [All Fields]) OR (“Receptors, Leukotriene” [MeSH Terms] AND “antagonist” [All Fields]) OR (((“Receptors, Leukotriene” [MeSH Terms]) OR (“receptor” [All Fields] AND “leukotriene” [All Fields]) OR “leukotriene receptor” [All Fields]) AND “blocker” [All Fields])) AND (“neuropsychiatric” [All Fields] OR “psychiatry” [MeSH Terms] OR “psychiatry” [All Fields] OR “psychiatric” [All Fields] OR “mental” [All Fields] OR “mental disorders” [All Fields] OR (“mental” [All Fields] AND “disorders” [All Fields]) OR “mental disorders” [MeSH Terms] OR “psychiatric disease” [All Fields] OR (psychiatric [All Fields] AND disease [All Fields]) OR “psychiatric illness” [All Fields] OR (psychiatric [All Fields] AND illness [All Fields]) OR “psychiatric diagnosis” [All Fields] OR (psychiatric [All Fields] AND diagnosis [All Fields]) OR adverse [All Fields] OR schizophrenia [MeSH Terms] OR schizophrenia [All Fields] OR (“schizophrenic” [All Fields] AND “disorder” [All Fields]) OR “bipolar disorder” [MeSH Terms] OR “bipolar disorder” [All Fields] OR (bipolar [All Fields] AND disorder [All Fields]) OR “bipolar disorders” [All Fields] OR (bipolar [All Fields] AND disorders [All Fields]) OR mania [All Fields] OR depression [MeSH Terms] OR depression [All Fields] OR “depressive disorder” [MeSH Terms] OR “depressive disorder” [All Fields] OR (depressive [All Fields] AND disorder [All Fields]) OR “depressive disorders” [All Fields] OR (depressive [All Fields] AND disorders [All Fields]) OR “mood disorders” [MeSH Terms] OR “mood disorders” [All Fields] OR “mood disorder” [All Fields] OR (mood [All Fields] AND disorder [All Fields]) OR (mood [All Fields] AND disorders [All Fields]) OR “psychotic disorders” [MeSH Terms] OR (“psychotic disorders” [All Fields]) OR (“psychotic” [All Fields] AND “disorders” [All Fields]) OR (“psychotic disorder” [All Fields]) OR (“psychotic” [All Fields] AND “disorder” [All Fields]) OR psychosis [All Fields] OR confusion [MeSH Terms] OR confusion [All Fields] OR anxiety [MeSH Terms] OR anxiety [All Fields] OR “anxiety disorders” [MeSH Terms] OR “anxiety disorders” [All Fields] OR (anxiety [All Fields] AND disorders [All Fields]) OR “anxiety disorder” [All Fields] OR (anxiety [All Fields] AND disorder [All Fields]) OR nervousness [All Fields] OR (“Stress” [Journal] OR “stress” [All Fields]) OR “personality disorders” [MeSH Terms] OR “personality disorders” [All Fields] OR (personality [All Fields] AND disorders [All Fields]) OR “personality disorder” [All Fields] OR (personality [All Fields] AND disorder [All Fields]) OR sleep [MeSH Terms] OR sleep [All Fields] OR “sleep-wake transition disorders” [MeSH Terms] OR “sleep-wake transition disorders” [All Fields] OR “sleep arousal disorders” [MeSH Terms] OR “sleep arousal disorders” [All Fields] OR “sleep stages” [MeSH Terms] OR “sleep stages” [All Fields] OR (sleep [All Fields] AND stage [All Fields]) OR “sleep wake disorders” [MeSH Terms] OR “sleep wake disorders” [All Fields] OR (sleep [All Fields] AND wake [All Fields] AND disorders [All Fields]) OR “sleep initiation and maintenance disorders” [MeSH Terms] OR (sleep [All Fields] AND initiation [All Fields] AND maintenance [All Fields] AND disorders [All Fields]) OR insomnia [All Fields] OR somnolence [All Fields] OR parasomnia [All Fields] OR “night terrors” [MeSH Terms] OR “night terrors” [All Fields] OR nightmare [All Fields] OR dreams [MeSH Terms] OR dreams [All Fields] OR aggression [MeSH Terms] OR aggression [All Fields] OR aggressiveness [All Fields] OR hostility [MeSH Terms] OR hostility [All Fields] OR hostile [All Fields] OR “psychomotor agitation” [MeSH Terms] OR “psychomotor agitation” [All Fields] OR (psychomotor [All Fields] AND agitation [All Fields]) OR agitation [All Fields] OR restlessness [All Fields] OR disorientation [All Fields] OR hyperkinesia [MeSH Terms] OR hyperkinesia [All Fields] OR hyperactivity [All Fields] OR “problem behavior” [MeSH Terms] OR “problem behavior” [All Fields] OR (problem [All Fields] AND behavior [All Fields]) OR behavior [MeSH Terms] OR behaviour [All Fields] OR “behavioural disorders” [All Fields] OR (behavioural [All Fields] AND disorder [All Fields]) OR “irritable mood” [MeSH Terms] OR “irritable mood” [All Fields] OR (irritable [All Fields] AND mood

[All Fields]) OR "irritability" [All Fields] OR suicide [MeSH Terms] OR suicide [All Fields] OR "suicidal ideation" [MeSH Terms] OR "suicidal ideation" [All Fields] OR (suicidal [All Fields] AND ideation [All Fields]) OR "suicidal behaviour" [All Fields] OR (suicidal [All Fields] AND behaviour [All Fields]) OR self-harm [All Fields] OR self-injury [All Fields] OR hallucinations [MeSH Terms] OR hallucinations [All Fields] OR hallucination [All Fields] OR delusions [MeSH Terms] OR delusions [All Fields] OR delusion [All Fields] OR vertigo [MeSH Terms] OR vertigo [All Fields] OR "speech disorders" [MeSH Terms] OR "speech disorders" [All Fields] OR (speech [All Fields] AND disorders [All Fields]) OR "disruptive, impulse control, and conduct disorders" [MeSH Terms] OR "disruptive, impulse control, and conduct disorders" [All Fields] OR (disruptive [All Fields] AND impulse [All Fields] AND control [All Fields] AND conduct [All Fields] AND disorders [All Fields]) OR "impulse control disorders" [All Fields] OR (impulse [All Fields] AND control [All Fields] AND disorders [All Fields]) OR violence [MeSH Terms] OR violence [All Fields] OR "attention deficit disorder with hyperactivity" [MeSH Terms] OR "attention deficit disorder with hyperactivity" [All Fields] OR adhd [All Fields] OR "attention deficit disorder" [All Fields] OR (attention [All Fields] AND deficit [All Fields] AND disorder [All Fields]) OR "cognitive dysfunction" [MeSH Terms] OR "cognitive dysfunction" [All Fields] OR (cognitive [All Fields] AND dysfunction [All Fields]) OR "cognitive impairment" [All Fields] OR (cognitive [All Fields] AND impairment [All Fields]) OR "memory disorders" [MeSH Terms] OR "memory disorders" [All Fields] OR (memory [All Fields] AND disorders [All Fields]) OR "memory loss" [All Fields] OR (memory [All Fields] AND loss [All Fields]) OR "memory disorder" [All Fields] OR (memory [All Fields] AND disorder [All Fields]) OR amnesia [MeSH Terms] OR amnesia [All Fields] OR seizures [MeSH Terms] OR seizures [All Fields] OR tremor [MeSH Terms] OR tremor [All Fields])

## Searching Terms in EMBASE

|           |                                 |
|-----------|---------------------------------|
| <b>1</b>  | <b>montelukast</b>              |
| <b>2</b>  | singulair                       |
| <b>3</b>  | leukotriene modifying           |
| <b>4</b>  | leukotriene antagonist          |
| <b>5</b>  | leukotriene receptor antagonist |
| <b>6</b>  | leukotriene receptor blocker    |
| <b>7</b>  | LTMA                            |
| <b>8</b>  | LTRA                            |
| <b>9</b>  | psychiatric                     |
| <b>10</b> | neuropsychiatric                |
| <b>11</b> | mental                          |
| <b>12</b> | schizophrenia                   |
| <b>13</b> | bipolar                         |
| <b>14</b> | mania                           |
| <b>15</b> | mood disorder                   |
| <b>16</b> | depression                      |
| <b>17</b> | psychotic disorder              |
| <b>18</b> | psychosis                       |
| <b>19</b> | confusion                       |
| <b>20</b> | anxiety                         |
| <b>21</b> | stress                          |
| <b>22</b> | personality disorder            |
| <b>23</b> | sleep disorder                  |
| <b>24</b> | insomnia                        |
| <b>25</b> | somnolence                      |
| <b>26</b> | parasomnia                      |
| <b>27</b> | nightmare                       |
| <b>28</b> | dream                           |
| <b>29</b> | aggression                      |
| <b>30</b> | aggressiveness                  |

|           |                                                                                                                                                                                                                                                                                             |
|-----------|---------------------------------------------------------------------------------------------------------------------------------------------------------------------------------------------------------------------------------------------------------------------------------------------|
| <b>31</b> | hostility                                                                                                                                                                                                                                                                                   |
| <b>32</b> | psychomotor agitation                                                                                                                                                                                                                                                                       |
| <b>33</b> | restlessness                                                                                                                                                                                                                                                                                |
| <b>34</b> | disorientation                                                                                                                                                                                                                                                                              |
| <b>35</b> | hyperkinesia                                                                                                                                                                                                                                                                                |
| <b>36</b> | hyperactivity                                                                                                                                                                                                                                                                               |
| <b>37</b> | behavioural disorder                                                                                                                                                                                                                                                                        |
| <b>38</b> | behavior                                                                                                                                                                                                                                                                                    |
| <b>39</b> | irritability                                                                                                                                                                                                                                                                                |
| <b>40</b> | suicide                                                                                                                                                                                                                                                                                     |
| <b>41</b> | suicidal                                                                                                                                                                                                                                                                                    |
| <b>42</b> | self-harm                                                                                                                                                                                                                                                                                   |
| <b>43</b> | self-injury                                                                                                                                                                                                                                                                                 |
| <b>44</b> | hallucination                                                                                                                                                                                                                                                                               |
| <b>45</b> | delusion                                                                                                                                                                                                                                                                                    |
| <b>46</b> | vertigo                                                                                                                                                                                                                                                                                     |
| <b>47</b> | speech disorder                                                                                                                                                                                                                                                                             |
| <b>48</b> | impulse control disorder                                                                                                                                                                                                                                                                    |
| <b>49</b> | violence                                                                                                                                                                                                                                                                                    |
| <b>50</b> | attention deficit disorder                                                                                                                                                                                                                                                                  |
| <b>51</b> | cognitive impairment                                                                                                                                                                                                                                                                        |
| <b>52</b> | memory loss                                                                                                                                                                                                                                                                                 |
| <b>53</b> | memory disorder                                                                                                                                                                                                                                                                             |
| <b>54</b> | amnesia                                                                                                                                                                                                                                                                                     |
| <b>55</b> | seizure                                                                                                                                                                                                                                                                                     |
| <b>56</b> | tremor                                                                                                                                                                                                                                                                                      |
| <b>57</b> | 1 or 2 or 3 or 4 or 5 or 6 or 7 or 8                                                                                                                                                                                                                                                        |
| <b>58</b> | 9 or 10 or 11 or 12 or 13 or 14 or 15 or 16 or 17 or 18 or 19 or 20 or 21 or 22 or 23 or 24 or 25 or 26 or 27 or 28 or 29 or 30 or 31 or 32 or 33 or 34 or 35 or 36 or 37 or 38 or 39 or 40 or 41 or 42 or 43 or 44 or 45 or 46 or 47 or 48 or 49 or 50 or 51 or 52 or 53 or 54 or 55 or 56 |
| <b>59</b> | 57 and 58                                                                                                                                                                                                                                                                                   |



### **Search Terms for Cochrane Library**

(montelukast OR singulair OR leukotriene-modifying agents OR leukotriene receptor antagonist OR leukotriene antagonist OR leukotriene receptor blocker OR leukotriene inhibitor) AND (neuropsychiatric OR psychiatry OR psychiatric OR mental disorder OR psychiatric disease OR psychiatric illness OR psychiatric diagnosis OR schizophrenia OR schizophrenic disorder OR bipolar OR bipolar disorder OR mania OR depression OR depressive disorder OR mood disorder OR psychotic disorder OR psychosis OR confusion OR anxiety OR anxiety disorders OR stress OR nervousness OR personality disorder OR sleep OR sleep-wake transition disorders OR sleep arousal disorders OR sleep stages OR sleep wake disorders OR insomnia OR somnolence OR parasomnia OR night terrors OR nightmare OR dreams OR aggression OR aggressiveness OR hostility OR psychomotor agitation OR agitation OR restlessness OR disorientation OR hyperkinesia OR hyperactivity OR problem behavior OR behavioural disorders OR behavior OR irritable mood OR irritability OR suicide OR suicidal ideation OR suicidal behaviour OR self-harm OR self-injury OR hallucination OR delusion OR vertigo OR speech disorders OR ADHD OR disruptive impulse control conduct disorders OR impulse control disorders OR violence OR attention deficit disorder hyperactivity OR attention deficit disorder OR hyperactivity OR ADHD OR cognitive dysfunction OR cognitive impairment OR memory disorders OR memory loss OR memory disorder OR amnesia OR seizure OR tremor)

## Terminologies defined as NEs in this review

| Neuropsychiatric Events                                          | Terminologies included in this review                                                                                                                                                                                                                                 |
|------------------------------------------------------------------|-----------------------------------------------------------------------------------------------------------------------------------------------------------------------------------------------------------------------------------------------------------------------|
| <b><u>Events listed in montelukast FDA product label</u></b>     |                                                                                                                                                                                                                                                                       |
| <b>Neuropsychiatric Events</b>                                   | neuropsychiatric events, neuropsychiatric adverse drug reactions, neuropsychiatric disturbances, psychiatric events, psychiatric adverse drug reactions, psychiatric disturbances, psychiatric disorders, psychiatric diseases, psychiatric illness, mental disorders |
| <b>Agitation</b>                                                 | agitation, psychomotor agitation                                                                                                                                                                                                                                      |
| <b>Aggressive Behaviour / Hostility</b>                          | aggression, aggressiveness, aggressive behaviour, hostility, hostile, violence                                                                                                                                                                                        |
| <b>Anxiousness</b>                                               | anxiety, anxiety disorders, nervousness, excitation                                                                                                                                                                                                                   |
| <b>Depression</b>                                                | depression, depressive disorders, mood disorders                                                                                                                                                                                                                      |
| <b>Disorientation</b>                                            | disorientation                                                                                                                                                                                                                                                        |
| <b>Dream Abnormalities</b>                                       | night terrors, nightmares, dreams, abnormal dreams                                                                                                                                                                                                                    |
| <b>Hallucinations</b>                                            | hallucinations                                                                                                                                                                                                                                                        |
| <b>Insomnia</b>                                                  | sleep-wake transition disorders, sleep arousal disorders, sleep stages, sleep wake disorders, sleep initiation and maintenance disorders, insomnia, sleep disorders, sleep disturbances                                                                               |
| <b>Irritability</b>                                              | irritable mood, irritability                                                                                                                                                                                                                                          |
| <b>Restlessness</b>                                              | restlessness, hyperkinesia                                                                                                                                                                                                                                            |
| <b>Somnambulism</b>                                              | parasomnia                                                                                                                                                                                                                                                            |
| <b>Suicidal thinking and behavior (including suicide)</b>        | suicide, completed suicide, suicidal events, suicidal ideation, suicidal behaviour, suicidal attempts, self-harm, self-injury                                                                                                                                         |
| <b>Tremor</b>                                                    | tremor                                                                                                                                                                                                                                                                |
| <b>Drowsiness</b>                                                | somnolence, excessive sleepiness                                                                                                                                                                                                                                      |
| <b>Seizures</b>                                                  | seizures, epilepsy                                                                                                                                                                                                                                                    |
| <b><u>Events not listed in montelukast FDA product label</u></b> |                                                                                                                                                                                                                                                                       |
| <b>Attention-deficit/hyperactivity disorders</b>                 | hyperactivity, attention deficit disorder with hyperactivity, ADHD, attention deficit disorder                                                                                                                                                                        |
| <b>Bipolar disorders</b>                                         | bipolar disorder, mania                                                                                                                                                                                                                                               |
| <b>Psychosis</b>                                                 | psychotic disorders, psychosis                                                                                                                                                                                                                                        |
| <b>Confusion</b>                                                 | confusion, delusions, vertigo                                                                                                                                                                                                                                         |



|                                   |                                                                                     |
|-----------------------------------|-------------------------------------------------------------------------------------|
| <b>Abnormal behaviour</b>         | personality disorders, problem behaviour, behavioural disorders                     |
| <b>Speech disorders</b>           | speech disorders                                                                    |
| <b>Impulse control disorders</b>  | disruptive, impulse control and conduct disorders, impulse control disorders        |
| <b>Neurodegenerative diseases</b> | cognitive dysfunction, cognitive impairment, memory disorders, memory loss, amnesia |
| <b>Schizophrenia</b>              | schizophrenia, schizophrenic disorders                                              |

### Grouping of Neuropsychiatric Events into broad definition of outcomes in this review

| Outcome definitions in this review                | Mapped neuropsychiatric events                                                                                                       |
|---------------------------------------------------|--------------------------------------------------------------------------------------------------------------------------------------|
| <b><u>Primary Outcomes</u></b>                    |                                                                                                                                      |
| <b>Suicide-related outcomes</b>                   | suicidal thinking and behavior (including suicide)                                                                                   |
| <b>Depression-related outcomes</b>                | depression, antidepressants prescription                                                                                             |
| <b>Anxiety-related outcomes</b>                   | Aggressive behaviour, anxiousness, anxiety, generalized anxiety, other anxiety                                                       |
| <b>Sleeping disorders</b>                         | dream abnormalities, insomnia, somnambulism, nightmare, hypersomnia, circadian rhythm disorder, prescription of sleeping medications |
| <b>Neurodegenerative disease-related outcomes</b> | cognitive dysfunction, cognitive impairment, memory disorders, memory loss, amnesia, dementia                                        |
| <b><u>Secondary Outcomes</u></b>                  |                                                                                                                                      |
| <b>Other neuropsychiatric outcomes</b>            | neuropsychiatric events listed above, but not classified in in primary outcomes                                                      |

## SUPPLEMENTARY MATERIAL 2. Data extraction strategy under the PICO tool

| <b>PICO Tool Element</b> | <b>Description</b>                                                                                                                                                                                                                                                                      |
|--------------------------|-----------------------------------------------------------------------------------------------------------------------------------------------------------------------------------------------------------------------------------------------------------------------------------------|
| <b>Population</b>        | Patients who have a diagnosis for asthma upon receiving the first prescription of montelukast, with or without allergic rhinitis.<br>In prescription databases which diagnoses cannot be ascertained, prescriptions for drugs used in asthma will be used a proxy for asthma diagnosis. |
| <b>Intervention</b>      | Use of montelukast                                                                                                                                                                                                                                                                      |
| <b>Comparison</b>        | Non-users of montelukast, including placebo, inhaled corticosteroids, or inhaled corticosteroids plus long-acting beta-agonists combinations                                                                                                                                            |
| <b>Outcome</b>           | <u>Primary Outcomes</u><br>Suicide-related outcomes, depression-related outcomes, anxiety-related outcomes, sleeping disorders, neurodegenerative disease-related outcomes.<br><u>Secondary Outcomes</u><br>Other neuropsychiatric outcomes                                             |

**SUPPLEMENTARY MATERIAL 3. Study characteristics of pharmacovigilance studies**

| Study             | Publish Year | Study Period       | Data Source                                             | Inclusion Criteria                                                                                                     | Exposure                                                       | Results and Outcomes                                                                                                                                                                                                                                             |
|-------------------|--------------|--------------------|---------------------------------------------------------|------------------------------------------------------------------------------------------------------------------------|----------------------------------------------------------------|------------------------------------------------------------------------------------------------------------------------------------------------------------------------------------------------------------------------------------------------------------------|
| Shin et al. [1]   | 2022         | Jan 2014- Dec 2018 | Korean Adverse Event Reporting System                   | 1. ADRs of montelukast and pranlukast                                                                                  | MTK or pranlukast                                              | ADR reports related to MTK by gender (male / female) for:<br>1. psychiatric ADRs: 131; 0.067% / 278; 0.139%<br>2. somnolence: 62 / 135<br>3. insomnia: 45 / 113                                                                                                  |
| Fox et al. [2]    | 2022         | 2014               | United States Veterans Affairs Corporate Data Warehouse | 1. Ratio of patients with incident NE detected within the year post- to pre- MTK initiation (expressed as SR)          | MTK                                                            | SR between MTK initiation and:<br>1. incident NE: 0.84 (0.80-0.89)<br>2. incident antidepressant prescription: 0.75 (0.68-0.83)                                                                                                                                  |
| Watson et al. [3] | 2022         | Up to 3 May 2020   | VigiBase from the WHO                                   | 1. Reports of nightmares with MTK                                                                                      | MTK                                                            | Disproportionality analysis of nightmare reports based on:<br>1. reports (reported / expected): 1118 / 44<br>2. IC value: 4.6                                                                                                                                    |
| Umetsu et al. [4] | 2021         | Jan 2004- Dec 2018 | FDA Adverse Event Reporting System                      | 1. ADR reports related to MTK<br>2. MTK-associated genes retrieved from DGIdb                                          | MTK                                                            | Reported ORs for:<br>1. abnormal behaviour: 33.9 (31.8-36.2)<br>2. aggression: 31.7 (29.8-33.8)<br>3. suicidal ideation: 21.5 (20.3-22.9)<br>4. suicidal attempts: 9.5 (8.5-10.5)<br>5. depression: 8.2 (7.8-8.7)                                                |
| Neha et al. [5]   | 2021         | 2009-2013          | FDA Adverse Event Reporting System                      | 1. ADR reports for 4 quarters before and after safety alert change by FDA                                              | 31 drugs with label changes within study period, including MTK | Figures (before; after FDA label changes)<br>1. Number of ADRs (322; 274)<br>2. Reported OR (8.77; 3.35)<br>3. PRR (9.6; 3.41)                                                                                                                                   |
| Bian et al. [6]   | 2021         | 2004-2020          | FDA Adverse Event Reporting System                      | 1. ADR events of neuropsychiatric symptoms<br>2. Disproportionality to LTRA reported as reported OR, PRR and IC values | LTRA, H1-antihistamines and ICS                                | Disproportionality of montelukast to neuropsychiatric symptoms measured by:<br>1. reported OR: 10.35 (10.00-10.70)<br>2. PRR: 7.21<br>3. IC Value: 2.84<br>Mean time to onset (interquartile range) of neuropsychiatric symptoms for<br>1. LTRA: 31 (1-306) days |

|                          |      |                      |                                                                                                               |                                                                                                                                                                                                                                 |                                               |                                                                                                                                                                                                                                                                                                                                                                                                                                                                                         |
|--------------------------|------|----------------------|---------------------------------------------------------------------------------------------------------------|---------------------------------------------------------------------------------------------------------------------------------------------------------------------------------------------------------------------------------|-----------------------------------------------|-----------------------------------------------------------------------------------------------------------------------------------------------------------------------------------------------------------------------------------------------------------------------------------------------------------------------------------------------------------------------------------------------------------------------------------------------------------------------------------------|
| Ekhart et al. [7]        | 2020 | 2003-2016            | Netherlands Pharmacovigilance Center Lareb                                                                    | <ol style="list-style-type: none"> <li>All reports of children aged 1-18 years</li> <li>Excluded reports of children &lt; 1 years</li> </ol>                                                                                    | MTK                                           | <ol style="list-style-type: none"> <li>Reports of psychiatric ADRs associated with MTK use: 40/918 (4%)</li> <li>NEs reported: abnormal behavior, aggression, agitation, anxiety, irritability, restlessness</li> </ol>                                                                                                                                                                                                                                                                 |
| Arnold et al. [8]        | 2020 | 2000-2016            | National Poison Data System of the American Association of Poison Control Centers                             | <ol style="list-style-type: none"> <li>5-17 years old</li> <li>Single, weight-based, high-dose montelukast ingestions (<math>\geq 50</math> mg)</li> </ol>                                                                      | MTK                                           | <ol style="list-style-type: none"> <li>20 ADRs among 312 individuals with body weight available</li> <li>Adjusted OR for increased ADR with increasing mg/kg doses <math>\geq 50</math> mg: 1.16 (0.97-1.38, p-value = 0.10)</li> </ol>                                                                                                                                                                                                                                                 |
| Winkel et al. [9]        | 2018 | 2000-2016            | Register of Medicinal Products Statistics; Danish National Patient Register; Danish Civil Registration System | <ol style="list-style-type: none"> <li>All adults (<math>\geq 18</math> years) who were Denmark residents during study period</li> <li>Redeemed first prescription of MTK and antidepressants within 1-year interval</li> </ol> | MTK / Antidepressants as proxy for depression | <ol style="list-style-type: none"> <li>Crude SR between MTK initiation and antidepressant prescription afterwards: 1.99 (1.11-1.28)</li> <li>Crude SR subgroup analysis for ICS patients: 1.27 (1.03-1.58) / LABA + ICS: 1.19 (1.04-1.37) / short-acting inhalation and nasal topical antiallergic treatment: 3.17 (1.46-9.69)</li> </ol>                                                                                                                                               |
| Haarman et al. [10]      | 2017 | Up to July 2016      | Netherlands Pharmacovigilance Center Lareb and VigiBase from the WHO                                          | <ol style="list-style-type: none"> <li>All ADRs of MTK reported in all ages</li> <li>Grouped by 0-18 yo / &gt; 19 yo</li> </ol>                                                                                                 | MTK                                           | <p>Reported OR for VigiBase / Lareb:</p> <ol style="list-style-type: none"> <li>Depression: 6.93 (6.5-7.4) / 1.91 (0.8-4.6)</li> <li>Aggression: 24.99 (23.5-26.6) / 9.27 (5.1-17.0)</li> <li>Suicidal ideation: 20.4 (19.0-22.0) / -</li> <li>Insomnia 5.08 (4.77-5.41) / 3.45 (2.05-5.81)</li> <li>Anxiety 5.11 (4.79-5.46) / 2.79 (1.24-6.26)</li> <li>Abnormal behavior: 34.05 (31.8-36.5) / 12.02 (5.6-25.6)</li> <li>Nightmares: 22.46 (20.9-24.2) / 19.29 (12.8-29.2)</li> </ol> |
| Arnold et al. [11]       | 2018 | 2000-2016            | American Association of Poison Control Centers (AAPCC) National Poison Data System database                   | <ol style="list-style-type: none"> <li>MTK users aged 5-17 years</li> <li>Subgrouped by dose of exposure (<math>\geq 50</math> mg / all ingested doses)</li> </ol>                                                              | MTK                                           | <ol style="list-style-type: none"> <li>Most common ADR: abdominal pain (40/17069)</li> <li>Neuropsychiatric ADR: 22/17069 (composite of confusion, dizziness or vertigo, hallucinations or delusions, slurred speech)</li> </ol>                                                                                                                                                                                                                                                        |
| Aldea Perona et al. [12] | 2016 | Up to 1 January 2015 | VigiBase from the WHO                                                                                         | <ol style="list-style-type: none"> <li>Subjects &lt; 18 years with MTK exposure</li> <li>Subgrouped into infants (&lt; 2 yo), children (2-11 yo) and adolescents (12-17 yo)</li> </ol>                                          | MTK                                           | <ol style="list-style-type: none"> <li>2630 ICSRs were psychiatric disorders in 14670 of ICSR reported for MTK</li> <li>IC Values for suicidal behavior in</li> <li>Aged 2-11: 5.01</li> <li>Aged 12-18: 3.85</li> <li>Aged above 18: 2.80</li> </ol>                                                                                                                                                                                                                                   |

|                                           |      |                     |                                                                                 |                                                                                                                                                                                                                                                              |                                   |                                                                                                                                                                                                                                                                                                                                                                                                                                                            |
|-------------------------------------------|------|---------------------|---------------------------------------------------------------------------------|--------------------------------------------------------------------------------------------------------------------------------------------------------------------------------------------------------------------------------------------------------------|-----------------------------------|------------------------------------------------------------------------------------------------------------------------------------------------------------------------------------------------------------------------------------------------------------------------------------------------------------------------------------------------------------------------------------------------------------------------------------------------------------|
| Lafay-Chebassier et al. <sup>a</sup> [13] | 2015 | 2007-2011           | French Pharmacovigilance Database (FPVD)                                        | 1. Reports of depression in the FPVD between study period                                                                                                                                                                                                    | MTK                               | 1. Reporting OR for MTK = 8.9 (3.3-24.3) [14]                                                                                                                                                                                                                                                                                                                                                                                                              |
| Aagaard & Hansen [15]                     | 2014 | 2007-2011           | EudraVigilance database from the European Union                                 | 1. ADRs in children below 18 years and taking asthma medications                                                                                                                                                                                             | MTK                               | 1. 31 reports of psychiatric disorders out of 76 cases reported for MTK<br>2. NEs reported: nightmare and aggression                                                                                                                                                                                                                                                                                                                                       |
| Marchand et al. [16]                      | 2013 | 1998-2012           | French National Pharmacovigilance Database (BNPV)                               | 1. ADRs of psychiatric disorders<br>2. Suspected to be related to MTK prescription                                                                                                                                                                           | MTK                               | 1. 56 ADRs (19%) are psychiatric disorders out of 295 ADRs reported in MTK<br>2. NEs reported: insomnia, nightmares, behavioral disorders, hallucination, depression (suicidal ideation, attraction to emptiness, total lack of desire)                                                                                                                                                                                                                    |
| Cereza et al. [17]                        | 2012 | Up to December 2011 | Spanish System of Pharmacovigilance                                             | 1. Reports for psychiatric ADRs especially nightmares<br>2. Montelukast users                                                                                                                                                                                | MTK                               | 1. 24 reports of nightmare, age ranging from 2-66 years, age ranging from 2-66 years<br>2. Concomitant NEs other than nightmare: insomnia, nervousness, hallucinations, aggressiveness, irritability, anxiety                                                                                                                                                                                                                                              |
| Bygdell et al. [18]                       | 2012 | 2001-2010           | Swedish Drug Information System (SWEDIS)                                        | 1. ICSRs registered during 2001-2010<br>2. Children < 18 years old<br>3. Psychiatric Disorder Class according to the term in Medical Product Agency adverse reaction terminology<br>4. Possible causal relationship between suspected drugs and reported ADR | MTK                               | 1. 60 ICSRs of psychiatric disorders reported were linked with MTK<br>2. Most frequent NEs reported (by order): nightmares, aggressiveness, sleep disorders, anxiety, personality disorders, hyperactivity, depressed mood, irritability, hallucination                                                                                                                                                                                                    |
| Schumock et al. [19]                      | 2011 | 1999-2009           | FDA Adverse Events Reporting System & Xponent database, IMS Health Incorporated | 1. Initial reports of completed suicides<br>2. Reports in which montelukast/zafirlukast/zileuton was listed as the primary suspected, secondary suspected or concomitant drug<br>3. Reports involving SSRIs also examined                                    | LTRA (MTK, zafirlukast, zileuton) | 1. 101 (96%) cases of completed suicides related to MTK among 105 reports related to LTRAs<br>2. 96/105 (91%) of reports occurred in 2008 or 2009, when FDA warning was strengthened<br>3. Suicide rate for MTK (per million prescriptions): 0.06 (0.03-0.12) in 1999-2007, 1.83 (1.47-2.24) in 2008-2009<br>4. EB rate multiplier for MTK compared with SABA: 1.80 (1.48-2.18) in 1999-2009, 0.69 (0.44-1.08) in 1999-2007, 5.61 (4.56-6.89) in 2008-2009 |

|                         |      |                           |                                          |                                                                                                                                  |     |                                                                                                                                                                                                                                                                                                                                                                |
|-------------------------|------|---------------------------|------------------------------------------|----------------------------------------------------------------------------------------------------------------------------------|-----|----------------------------------------------------------------------------------------------------------------------------------------------------------------------------------------------------------------------------------------------------------------------------------------------------------------------------------------------------------------|
| Wallerstedt et al. [20] | 2009 | 1998-2007                 | Swedish Drug Information System (SWEDIS) | <ol style="list-style-type: none"> <li>1. ADRs of psychiatric disorders with MTK</li> <li>2. Aged &lt; 18 years</li> </ol>       | MTK | <ol style="list-style-type: none"> <li>1. 44/103 (43%) of reports on MTK were psychiatric disorders</li> <li>2. IC value for composite psychiatric disorders outcome: 2.51 (95%<sub>low</sub>: 2.14)</li> <li>3. NEs reported with disproportionality (IC 95%<sub>low</sub> &gt; 0): hyperreactivity, anxiety, nightmares, insomnia, aggressiveness</li> </ol> |
| Brunlöf et al.[21]      | 2008 | January to December 2005  | Swedish Drug Information System (SWEDIS) | <ol style="list-style-type: none"> <li>1. ICSRs reported to SWEDIS</li> <li>2. Children aged &lt; 15 years</li> </ol>            | MTK | <ol style="list-style-type: none"> <li>1. 16 ICSRs reported were linked to montelukast</li> <li>2. 12 out of 16 ICSRs were reported in children aged &lt; 5 years old</li> <li>3. NEs reported: nightmare, sleep disorders, anxiety, aggressiveness</li> </ol>                                                                                                 |
| Biswas et al. [22]      | 2001 | February to December 1998 | Drug Safety Research Unit                | <ol style="list-style-type: none"> <li>1. Reports of all event data collected from patient after prescriptions of MTK</li> </ol> | MTK | <ol style="list-style-type: none"> <li>1. 191 (1.2%) of patients reported ADRs</li> <li>2. NEs reported: insomnia, depression, abnormal dreams</li> </ol>                                                                                                                                                                                                      |

### Abbreviations

ADR = adverse drug reactions; EB = Empirical Bayes; IC = information component (measure of disproportionality between expected and reported rates of ADR); ICS = inhaled corticosteroids; IC025 = lower 95% confidence interval for IC values; ICSRs = individual case safety reports; LABA = long-acting beta-agonists; LTRA = leukotriene receptor antagonists; MTK = montelukast; NE: neuropsychiatric events; OR = odds ratio; PRR = proportional reporting ratio; SABA = short-acting beta-agonists; SR = sequence ratio; SSRI = selective serotonin reuptake inhibitors; WHO = World Health Organization.

<sup>a</sup> Only abstract of the article can be accessed. Results of the study are extracted from another study.

**SUPPLEMENTARY MATERIAL 4. Study characteristics of case reports**

| Study                       | Publish Year | Age (in years), Gender | Indication                          | Onset of NEs after therapy started (or withdrawal)       | Concomitant Medications                                                                          | NEs Reported; Prognosis                                                                                                                                                                                                                                                               |
|-----------------------------|--------------|------------------------|-------------------------------------|----------------------------------------------------------|--------------------------------------------------------------------------------------------------|---------------------------------------------------------------------------------------------------------------------------------------------------------------------------------------------------------------------------------------------------------------------------------------|
| Els & Webb [23]             | 2022         | 5, M                   | Asthma                              | 5 days (after withdrawal of MTK)                         | ICS                                                                                              | 1. NEs reported: severe agitation and anxiety, nightmare, panic attack and auditory hallucinations                                                                                                                                                                                    |
| McCarter & Blanchard [24]   | 2017         | 56, M                  | Asthma                              | 2-3 weeks                                                | Fluticasone 100 mcg/salmeterol 50 mcg, albuterol HFA                                             | 1. NEs reported: worsening generalized anxiety, wake up suddenly after several hours of sleep, sympathetic activation, elevated heart rate, flushing, panic symptoms<br>2. Completely resolved in several months<br>3. The patient takes eicosapentaenoic acid as fish oil supplement |
| Erdem et al. [25]           | 2016         | 15, F                  | Asthma                              | 3 days                                                   | Valproic acid, budesonide 400 mcg/day                                                            | 1. NEs reported: seizures<br>2. Resolved when LTRA stopped<br>3. The patient uses valproic acid for epilepsy                                                                                                                                                                          |
| Erdem et al. [25]           | 2016         | 6, F                   | Asthma                              | Unknown                                                  | Valproic acid                                                                                    | 1. NEs reported: seizures<br>2. Resolved when LTRA discontinued                                                                                                                                                                                                                       |
| Celmeli et al. [26]         | 2014         | 13, M                  | Asthma                              | 1 month                                                  | Fluticasone propionate 125 mcg BD                                                                | 1. NEs reported: anxiety, suicidal attempt, sleepiness, depression<br>2. Resolved within 1 week after withdrawal                                                                                                                                                                      |
| Ibarra-Barrueta et al. [27] | 2014         | 41, F                  | Asthma (started MTK in 2011)        | Days (after concomitant use of antiretrovirals with MTK) | Efavirenz, emtricitabine and TDF (HIV since 2007), ICS, formoterol, antihistamines               | 1. NEs reported: disturbed sleep, vivid dreams, irritability, confusion, difficulties with concentration<br>2. Resolved within 1 months after MTK discontinued                                                                                                                        |
| Alkhuja et al. [28]         | 2013         | 16, F                  | Relief for allergy-related symptoms | 1 day                                                    | Fluticasone propionate 250 mcg/salmeterol 50 mcg, albuterol sulfate inhalers                     | 1. NEs reported: daily parasomnias (sleeptalking and sleepwalking)<br>2. Resolved after MTK discontinued, re-challenge on MTK failed                                                                                                                                                  |
| Kocyigit et al. [29]        | 2013         | 13, M                  | Asthma                              | 24-36 hours                                              | Formoterol and budesonide inhaler, prednisolone (Asthma), thioridazine (hyperreactivity at 7 yo) | 1. NEs reported: visual hallucinations, severe anxiety, insomnia<br>2. Hallucination resolved quickly after MTK discontinued                                                                                                                                                          |



|                        |      |       |        |                        |                                                                                     |                                                                                                                                                                                                 |
|------------------------|------|-------|--------|------------------------|-------------------------------------------------------------------------------------|-------------------------------------------------------------------------------------------------------------------------------------------------------------------------------------------------|
| Byrne et al. [30]      | 2012 | 9, M  | Asthma | 2.5 years              | Beclomethasone inhaler 50 mcg BD                                                    | <ol style="list-style-type: none"> <li>1. NEs reported; difficulty sleeping, anxiety, sleepwalking</li> <li>2. MTK was not withdrawn, resolved 7 months after onset</li> </ol>                  |
| Skillman et al. [31]   | 2011 | 4, M  | Asthma | 5 months               | Albuterol 2.5 mg nebulized mist every 4 to 6 hours as needed, cetirizine 5 mg daily | <ol style="list-style-type: none"> <li>1. NEs reported: sleepwalking, night terrors, sleep disturbances, anxiety, irritability</li> <li>2. Resolved in 2 weeks after discontinuation</li> </ol> |
| Skillman et al. [31]   | 2011 | 6, F  | Asthma | 1-2 weeks <sup>a</sup> | Albuterol as needed                                                                 | <ol style="list-style-type: none"> <li>1. NEs reported: anxiety, sleeping disturbances</li> <li>2. Resolved in 1 month after reduction in MTK dose</li> </ol>                                   |
| Anandan & Ibitoye [32] | 2008 | 29, F | Asthma | Within 48 hours        | Quetiapine 750 mg daily                                                             | <ol style="list-style-type: none"> <li>1. NEs reported: hallucinations</li> <li>2. Resolved after 2 days</li> </ol>                                                                             |

### Abbreviations

BD = twice daily; F = female; HIV = human immunodeficiency viruses; ICS = inhaled corticosteroids M = male; MTK = montelukast; NE = neuropsychiatric events; TDF = tenofovir disoproxil fumarate; yo = years old

<sup>a</sup> Dose of montelukast has been escalated from 4 mg to 5 mg 11 weeks before the patient seeks medical attention. The patient reported anxiety symptoms to start 2 months before the clinical visit.

**SUPPLEMENTARY MATERIAL 5. Study characteristics of case series**

| <b>Study</b>              | <b>Publish Year</b> | <b>Number of Case Reports</b> | <b>Indication(s)</b>        | <b>Inclusion Criteria</b>                                                                                                                                                                                                                                                                                 | <b>Key Findings</b>                                                                                                                                                                                                                                                                                                                                   |
|---------------------------|---------------------|-------------------------------|-----------------------------|-----------------------------------------------------------------------------------------------------------------------------------------------------------------------------------------------------------------------------------------------------------------------------------------------------------|-------------------------------------------------------------------------------------------------------------------------------------------------------------------------------------------------------------------------------------------------------------------------------------------------------------------------------------------------------|
| Lafuente et al. [33]      | 2021                | 20                            | Asthma / recurrent wheezing | <ol style="list-style-type: none"> <li>1. Recurrent wheezing and/or asthma</li> <li>2. Aged 0-15 yo</li> </ol>                                                                                                                                                                                            | <ol style="list-style-type: none"> <li>1. 20 (5.7%) of patients presented with ADRs</li> <li>2. NEs reported: insomnia (n=7), hyperactivity (n=4), nightmares (n=3), hallucinations (n=1)</li> </ol>                                                                                                                                                  |
| Erdem et al. [34]         | 2015                | 1024                          | Asthma / Early wheezing     | <ol style="list-style-type: none"> <li>1. Early wheezing or asthma (including episodic or mild persistent)</li> <li>2. Only LTRA use as anti-inflammatory drug</li> <li>3. No other concomitant medications</li> <li>4. No ADRs before LTRA initiation and disappearance after discontinuation</li> </ol> | <ol style="list-style-type: none"> <li>1. 24 (59%) of ADRs are psychiatric</li> </ol> <p>Most commonly reported NEs:</p> <ol style="list-style-type: none"> <li>1. Hyperactivity: 7 (17%)</li> <li>2. Excessive sleepiness: 4 (9.7%)</li> <li>3. Nyctophobia: 4 (9.7%)</li> <li>4. Agitation: 4 (9.7%)</li> <li>5. Hallucination: 4 (9.7%)</li> </ol> |
| Xie et al. [35]           | 2013                | 19                            | Asthma                      | <ol style="list-style-type: none"> <li>1. ADRs associated with MTK use in China</li> <li>2. Inclusion period: 1999-2013</li> </ol>                                                                                                                                                                        | <ol style="list-style-type: none"> <li>1. 5 (26%) of reported ADRs were psychiatric disorders</li> <li>2. NEs reported: excitation (3 cases), sleeping disorders, inattention</li> </ol>                                                                                                                                                              |
| Callero-Viera et al. [36] | 2012                | 4                             | Asthma                      | Reports of children experiencing NE side effects                                                                                                                                                                                                                                                          | <ol style="list-style-type: none"> <li>1. All reports contain aggressive behavior</li> <li>2. Other NEs reported: behavioral disturbances, night terrors</li> </ol>                                                                                                                                                                                   |

**Abbreviations**

ADR = adverse drug reactions; LTRA = leukotriene receptor antagonists; MTK = montelukast; NE = neuropsychiatric events.

**SUPPLEMENTARY MATERIAL 6. Newcastle-Ottawa Scale scores for cohort studies**

| Study                      | Publication Year | Selection                            |                                          |                           |                                                                              | Comparability                |                           | Exposure              |                                                  |                                  | Total Quality Score |
|----------------------------|------------------|--------------------------------------|------------------------------------------|---------------------------|------------------------------------------------------------------------------|------------------------------|---------------------------|-----------------------|--------------------------------------------------|----------------------------------|---------------------|
|                            |                  | Representativeness of exposed cohort | Representativeness of non-exposed cohort | Ascertainment of exposure | Demonstration that the outcome of interest was not present at start of study | Adjusted for asthma severity | Adjusted for demographics | Assessment of outcome | Was follow-up long enough for outcomes to occur? | Adequacy of follow up of cohorts |                     |
| Paljarvi et al. [37]       | 2022             | 0                                    | 0                                        | 1                         | 0                                                                            | 1                            | 1                         | 1                     | 1                                                | 0                                | 5                   |
| Özata et al. [38]          | 2022             | 0                                    | 0                                        | 0                         | 1                                                                            | 0                            | 0                         | 1                     | 0                                                | 0                                | 2                   |
| Shim et al. [39]           | 2021             | 1                                    | 1                                        | 1                         | 1                                                                            | 0                            | 1                         | 1                     | 1                                                | 1                                | 8                   |
| Ishikura et al. [40]       | 2021             | 0                                    | 0                                        | 1                         | 1                                                                            | 0                            | 1                         | 1                     | 1                                                | 1                                | 6                   |
| Xiong et al. [41]          | 2021             | 0                                    | 0                                        | 1                         | 0                                                                            | 0                            | 1                         | 1                     | 1                                                | 0                                | 5                   |
| Grinde et al. [42]         | 2017             | 0                                    | 0                                        | 1                         | 1                                                                            | 0                            | 1                         | 1                     | 1                                                | 0                                | 5                   |
| Sansing-Foster et al. [43] | 2020             | 1                                    | 1                                        | 1                         | 0                                                                            | 1                            | 1                         | 1                     | 0                                                | 0                                | 6                   |
| Bayer et al. [44]          | 2020             | 0                                    | 0                                        | 1                         | 1                                                                            | 0                            | 0                         | 1                     | 0                                                | 1                                | 4                   |
| Huang et al.[45]           | 2020             | 0                                    | 0                                        | 1                         | 1                                                                            | 1                            | 1                         | 1                     | 1                                                | 1                                | 7                   |
| Benard et al. [46]         | 2017             | 0                                    | 0                                        | 1                         | 0                                                                            | 1                            | 0                         | 1                     | 1                                                | 0                                | 4                   |
| Chen et al. [47]           | 2014             | 1                                    | 1                                        | 1                         | 0                                                                            | 0                            | 1                         | 1                     | 1                                                | 1                                | 7                   |
| Jick et al. [48]           | 2009             | 1                                    | 0                                        | 1                         | 0                                                                            | 0                            | 0                         | 1                     | 0                                                | 0                                | 3                   |

**Key**

A study can be awarded a maximum of one star for each numbered item within the Selection and Exposure categories. A maximum of two stars can be given for Comparability.

## **Selection**

### **A) Representativeness of the exposed cohort**

- 1) Truly or somewhat representative of the average population with asthma in the community
- 0) Selected group of users (e.g.: nurses, volunteers, patients in specific age groups) or no description of the derivation of the cohort

### **B) Selection of the non-exposed cohort**

- 1) Drawn from the same community as the exposed cohort
- 0) Drawn from a different source or no description of the derivation of the non-exposed cohort

### **C) Ascertainment of exposure**

- 1) Secure record (e.g.: surgical records) or structured interview
- 0) Written self-report or no description

### **D) Demonstration that outcome of interest was not present at start of study**

- 1) Yes
- 0) No

## **Comparability**

### **A) Comparability of cohorts on the basis of the design or analysis**

- 1) Adjusted for severity of asthma
- 1) Adjusted for demographics

## **Outcome**

### **A) Assessment of outcome**

- 1) Independent blind assessment or record linkage
- 0) Self-report or no description

### **B) Was follow-up long enough for outcomes to occur**

- 1) Followed-up for 1 year or above
- 0) Followed-up for less than 1 year

### **C) Adequacy of follow up of cohort**

- 1) Complete follow up or subjects lost to follow up < 20%
- 0) Follow up rate < 80 % (select an adequate %) and no description of those lost or no statement

**SUPPLEMENTARY MATERIAL 7. Newcastle-Ottawa scale scores for case-control studies**

| Study                     | Publication Year | Selection                   |                             |                       |                        | Comparability                |                           | Exposure                  |                                                     |                   | Total Quality Score |
|---------------------------|------------------|-----------------------------|-----------------------------|-----------------------|------------------------|------------------------------|---------------------------|---------------------------|-----------------------------------------------------|-------------------|---------------------|
|                           |                  | Adequacy of case definition | Representativeness of cases | Selection of controls | Definition of controls | Adjusted for asthma severity | Adjusted for demographics | Ascertainment of exposure | Same method of ascertainment for cases and controls | Non-response rate |                     |
| Kang et al. [49]          | 2021             | 0                           | 1                           | 1                     | 1                      | 0                            | 1                         | 1                         | 1                                                   | 1                 | 7                   |
| Glockler-Lauf et al. [50] | 2019             | 0                           | 1                           | 1                     | 1                      | 1                            | 0                         | 1                         | 1                                                   | 1                 | 7                   |
| Ali et al. [51]           | 2015             | 0                           | 1                           | 1                     | 1                      | 1                            | 1                         | 1                         | 1                                                   | 1                 | 8                   |
| Schumock et al. [52]      | 2012             | 0                           | 1                           | 1                     | 1                      | 1                            | 1                         | 1                         | 1                                                   | 1                 | 8                   |

**Key**

A study can be awarded a maximum of one star for each numbered item within the Selection and Exposure categories. A maximum of two stars can be given for Comparability.

**Selection**

**A) Is the case definition adequate?**

- 1) Yes with independent validation
- 0) Yes (e.g.: record linkage or based on self-reports) or no description

**B) Representativeness of the cases**

- 1) Consecutive or obviously representative series of cases
- 0) Potential for selection biases or not stated

**C) Selection of Controls**

- 1) Community controls
- 0) Hospital controls or no description

**D) Definition of Controls**

- 1) No history of neuropsychiatric events
- 0) No description of source

**Comparability**

**A) Comparability of cases and controls on the basis of the design or analysis**

- 1) Adjusted for asthma severity
- 1) Adjusted for demographics

**Exposure**

**A) Ascertainment of exposure**

- 1) Secure record (e.g.: surgical records) or structured interview were blind to case/control status
- 0) Interview not blinded to case/control status, written self-report or medical record only or no description

**B) Same method of ascertainment for cases and controls**

- 1) Yes
- 0) No

**C) Non-Response rate**

- 1) Same rate for both groups
- 0) Non respondents described or rate different and no designation

## References

1. Shin EY, Jin JH, Kang MK, et al. Adverse drug reactions of montelukast and pranlukast: Analysis of the Korea database. *Asian Pac J Allergy Immunol* 2022.
2. Fox CW, Khaw CL, Gerke AK, et al. Montelukast and neuropsychiatric events - a sequence symmetry analysis. *J Asthma* 2022: 1-7.
3. Watson S, Kaminsky E, Taavola H, et al. Montelukast and Nightmares: Further Characterisation Using Data from VigiBase. *Drug Saf* 2022; 45(6): 675-684.
4. Umetsu R, Tanaka M, Nakayama Y, et al. Neuropsychiatric Adverse Events of Montelukast: An Analysis of Real-World Datasets and drug-gene Interaction Network. *Front Pharmacol* 2021; 12: 764279.
5. Neha R, Subeesh V, Beulah E, et al. Existence of Notoriety Bias in FDA Adverse Event Reporting System Database and Its Impact on Signal Strength. *Hosp Pharm* 2021; 56(3): 152-158.
6. Bian S, Li L, Wang Z, et al. Neuropsychiatric side reactions of leukotriene receptor antagonist, antihistamine, and inhaled corticosteroid: A real-world analysis of the Food and Drug Administration (FDA) Adverse Event Reporting System (FAERS). *World Allergy Organ J* 2021; 14(10): 100594.
7. Ekhart C, Vries T, Hunsel FV. Psychiatric adverse drug reactions in the paediatric population. *Arch Dis Child* 2020; 105(8): 749-755.
8. Arnold DH, Bowman N, Reiss TF, et al. Adverse events associated with weight-based, high-dose montelukast exposures in children. *Clin Toxicol (Phila)* 2020; 58(2): 145-146.
9. Winkel JS, Damkier P, Hallas J, et al. Treatment with montelukast and antidepressive medication-a symmetry analysis. *Pharmacoepidemiol Drug Saf* 2018; 27(12): 1409-1415.
10. Haarman MG, van Hunsel F, de Vries TW. Adverse drug reactions of montelukast in children and adults. *Pharmacol Res Perspect* 2017; 5(5).
11. Arnold DH, Bowman N, Reiss TF, et al. Adverse events are rare after single-dose montelukast exposures in children. *Clin Toxicol (Phila)* 2018; 56(1): 25-29.
12. Aldea Perona A, García-Sáiz M, Sanz Álvarez E. Psychiatric Disorders and Montelukast in Children: A Disproportionality Analysis of the VigiBase®. *Drug Saf* 2016; 39(1): 69-78.
13. Lafay-Chebassier C, Chavart F, Favrelière S, et al. Drug-induced Depression: a Case/Non Case Study in the French Pharmacovigilance Database. *Thérapie* 2015; 70(5): 425-432.
14. Law SWY, Wong AYS, Anand S, et al. Neuropsychiatric Events Associated with Leukotriene-Modifying Agents: A Systematic Review. *Drug Saf* 2018; 41(3): 253-265.
15. Aagaard L, Hansen EH. Paediatric adverse drug reactions following use of asthma medications in Europe from 2007 to 2011. *Int J Clin Pharm* 2014; 36(6): 1222-1229.
16. Marchand MS, Jonville-Béra AP, Autret-Leca E. [Psychiatric disorders associated with montelukast: data from the National Pharmacovigilance Database]. *Arch Pediatr* 2013; 20(3): 269-273.
17. Cereza G, Garcia Doladé N, Laporte JR. Nightmares induced by montelukast in children and adults. *Eur Respir J* 2012; 40(6): 1574-1575.
18. Bygdell M, Brunlof G, Wallerstedt SM, et al. Psychiatric adverse drug reactions reported during a 10-year period in the Swedish pediatric population. *Pharmacoepidemiol Drug Saf* 2012; 21(1): 79-86.
19. Schumock GT, Gibbons RD, Lee TA, et al. The Association Between Leukotriene-Modifying Agents and Spontaneously Reported Suicide. *Drug Inf J* 2012; 46(1): 99-106.
20. Wallerstedt SM, Brunlof G, Sundstrom A, et al. Montelukast and psychiatric disorders in children. *Pharmacoepidemiol Drug Saf* 2009; 18(9): 858-864.
21. Brunlof G, Tukukino C, Wallerstedt SM. Individual case safety reports in children in commonly used drug groups - signal detection. *BMC Clin Pharmacol* 2008; 8: 1.
22. Biswas P, Wilton L, Pearce G, et al. Pharmacovigilance and safety of the leukotriene receptor antagonist (LTRA), montelukast. *Clinical & experimental allergy reviews* 2001; 1(3): 300-304.
23. Els I, Webb S. Neuropsychiatric Event on Withdrawal of Montelukast. *J Paediatr Child Health* 2022; 58(4): 741.
24. McCarter GC, Blanchard LB. Similar adverse events from two disparate agents implicate lipid inflammatory mediators for a role in anxiety states. *Oxf Med Case Reports* 2017; 2017(11): omx060.
25. Erdem SB, Karaman S, Nacaroglu HT, et al. Seizures as a rare but serious adverse effect of leukotriene receptor. *Ann Allergy Asthma Immunol* 2016; 117(1): 99-101.
26. Celmeli F, Celmeli G, sürer adanır a, et al. Suicide Behaviour After Montelukast Usage: A Case Report. *Turkish Journal of Pediatric Disease* 2014.
27. Ibarra-Barrueta O, Palacios-Zabalza I, Mora-Atorrasagasti O, et al. Effect of concomitant use of montelukast and efavirenz on neuropsychiatric adverse events. *Ann Pharmacother* 2014; 48(1): 145-148.
28. Alkhuja S, Gazizov N, Alexander ME. Sleepwalking! Sleepwalking! Side effects of montelukast. *Case Rep Pulmonol* 2013; 2013: 813786.

29. Kocyigit A, Gulcan Oksuz B, Yazar F, et al. Hallucination development with montelukast in a child with asthma: case presentation. *Iran J Allergy Asthma Immunol* 2013; 12(4): 397-399.
30. Byrne F, Oluwole B, Whyte V, et al. Delayed Onset of Neuropsychiatric Effects Associated with Montelukast. *Ir J Psychol Med* 2012; 29(2): 125-127.
31. Skillman KL, Stumpf JL. Montelukast-induced anxiety in two pediatric patients. *Pharmacotherapy* 2011; 31(5): 90e-95e.
32. Anandan N, Ibitoye F. Montelukast and worsening of hallucinations in paranoid schizophrenia. *Psychiatr Bull R Coll Psychiatr* 2008; 32(7): 276.
33. Lafuente PC, Garcia Iniguez JP, de Vicente CM. Adverse drug reactions of montelukast: From theory to practice. Case report. [Spanish]. *Archivos Argentinos de Pediatría* 2021; 119(4): E357-E359.
34. Erdem SB, Nacaroglu HT, Unsal Karkiner CS, et al. Side Effects of Leukotriene Receptor Antagonists in Asthmatic Children. *Iran J Pediatr* 2015; 25(5): e3313.
35. Xie JX, Wei JF, Meng L. Montelukast sodium-induced hematuria: a case report and literature review of 19 cases in mainland China. *Int J Clin Pharmacol Ther* 2013; 51(12): 958-962.
36. Callero-Viera A, Infante S, Fuentes-Aparicio V, et al. Neuropsychiatric reactions to montelukast. *J Investig Allergol Clin Immunol* 2012; 22(6): 452-453.
37. Paljarvi T, Forton J, Luciano S, et al. Analysis of Neuropsychiatric Diagnoses After Montelukast Initiation. *JAMA Netw Open* 2022; 5(5): e2213643.
38. Özata E, Akelma Z, Günbey S. Relationship between montelukast and behavioral problems in preschool children with asthma. *Allergol Immunopathol (Madr)* 2022; 50(1): 85-91.
39. Shim JS, Kim MH, Kim MH, et al. Risk of Neuropsychiatric Diseases According to the use of a Leukotriene Receptor Antagonist in Middle-Aged and Older Adults with Asthma: a Nationwide Population-Based Study Using Health Claims Data in Korea. *J Allergy Clin Immunol Pract* 2021.
40. Ishikura Y, Maeda-Minami A, Hosokawa M, et al. Leukotriene Receptor Antagonist Use and Dementia Risk in Patients With Asthma: A Retrospective Cohort Study. *In Vivo* 2021; 35(6): 3297-3303.
41. Xiong LY, Ouk M, Wu CY, et al. Leukotriene receptor antagonist use and cognitive decline in normal cognition, mild cognitive impairment, and Alzheimer's dementia. *Alzheimers Res Ther* 2021; 13(1): 147.
42. Grinde B, Engdahl B. Prescription database analyses indicates that the asthma medicine montelukast might protect against dementia: a hypothesis to be verified. *Immun Ageing* 2017; 14: 20.
43. Sansing-Foster V, Haug N, Mosholder A, et al. Risk of Psychiatric Adverse Events Among Montelukast Users. *J Allergy Clin Immunol Pract* 2021; 9(1): 385-393.e312.
44. Yilmaz Bayer O, Turktas I, Ertoy Karagol HI, et al. Neuropsychiatric adverse drug reactions induced by montelukast impair the quality of life in children with asthma. *J Asthma* 2020: 1-14.
45. Huang PY, Yang YH, Huang YH, et al. Montelukast does not increase the risk of attention-deficit/hyperactivity disorder in pediatric asthma patients: A nationwide population-based matched cohort study. *J Formos Med Assoc* 2020.
46. Benard B, Bastien V, Vinet B, et al. Neuropsychiatric adverse drug reactions in children initiated on montelukast in real-life practice. *Eur Respir J* 2017; 50(2): 17001148.
47. Chen VC, Wang TN, Liao YT, et al. Asthma and self-harm: a population-based cohort study in Taiwan. *J Psychosom Res* 2014; 77(6): 462-467.
48. Jick H, Hagberg KW, Egger P. Rate of suicide in patients taking montelukast. *Pharmacotherapy* 2009; 29(2): 165-166.
49. Kang SO, Min KH, Kim HJ, et al. The role of leukotriene modifying agent treatment in neuropsychiatric events of elderly asthma patients: a nested case control study. *Asthma Res Pract* 2021; 7(1): 4.
50. Glockler-Lauf SD, Finkelstein Y, Zhu J, et al. Montelukast and Neuropsychiatric Events in Children with Asthma: A Nested Case-Control Study. *J Pediatr* 2019; 209: 176-182.e174.
51. Ali MM, O'Brien CE, Cleves MA, et al. Exploring the possible association between montelukast and neuropsychiatric events among children with asthma: a matched nested case-control study. *Pharmacoepidemiol Drug Saf* 2015; 24(4): 435-445.
52. Schumock GT, Stayner LT, Valuck RJ, et al. Risk of suicide attempt in asthmatic children and young adults prescribed leukotriene-modifying agents: a nested case-control study. *J Allergy Clin Immunol* 2012; 130(2): 368-375.
